# Supplementary material
Source: publisher site journal article supplement (https://www.dovepress.com/get_supplementary_file.php?f=334096.docx)
Supplement: Supplementary file 1 [file get_supplementary_file.php]

**Supplementary Table 1** Primer

| Gene | Forward | Reverse |
| --- | --- | --- |
| GAPDH | GGGAAACTGTGGCGTGAT | GAGTGGGTGTCGC TGTTGA |
| DBET | GAAGGAGATACTGGGAGTTGG | GCAAGGAAAATAGAAGTAGGCT |
| LINC00909 | GACAGAGCGAGATTCCGTCTC | GCATCTTCGCAGCTTAGCTCC |
| HSD52 | TTTCCGTGTCTTGATTGTGG | TTCTTATTGCTGGGCTGTTG |
| FLJ33534 | GCTGAGGGTGAGGATTGGAT | CCCACATCGTGTTTGGGAAC |

**Supplementary TABLE 2** Cox regression analysis of four lncRNAs for disease-free survival in CRC patients (n=138)

| **Variables** | **Multivariate analysis** | | |
| --- | --- | --- | --- |
|  | **HR** | **95% CI** | ***P* value** |
| DBET | 0.676 | 0.573-0.796 | <0.001 |
| LINC00909 | 0.681 | 0.543-0.854 | <0.001 |
| FLJ33534 | 0.759 | 0.636-0.906 | 0.002 |
| HSD52 | 0.914 | 0.793-1.054 | 0.216 |

HR, hazard ratio; CI, confidential interval

**Supplementary table 3** Baseline characteristics in CRC patients stratified by risk group

| **Characteristics** | **Low risk group**  **(n=69)** | **High risk group**  **(n=69)** | ***P* value** |
| --- | --- | --- | --- |
| Sex (%) |  |  | 0.392 |
| Male | 41 (59.4) | 35 (50.7) |  |
| Female | 28 (35.7) | 34 (49.3) |  |
| Age (years) | 62.8 ± 11.5 | 59.9 ± 12.2 | 0.156 |
| ASA score (%) |  |  | 0.378 |
| 1 | 52 (75.4) | 48 (69.6) |  |
| 2 | 9 (13.0) | 15 (21.7) |  |
| 3 | 8(11.6) | 6(8.7) |  |
| Emergency operation | 1 (1.4) | 1(1.4) | 1.000 |
| Tumor location |  |  | 0.530 |
| Ascending colon | 13 (18.8) | 13 (18.8) |  |
| Transverse colon | 11 (15.9) | 5(7.2) |  |
| Descending colon | 6 (8.7) | 4 (5.8) |  |
| Sigmoid | 18 (26.1) | 17 (24.6) |  |
| Rectal | 23 (33.3) | 28 (40.6) |  |
| Histopathology |  |  | 0.603 |
| Ulcering | 40 (58.0) | 39(56.5) |  |
| Expanding | 29(42.0) | 29 (42.0) |  |
| Infiltrating | 0(0.0) | 1 (1.4) |  |
| Histopathology (%) |  |  | 0.677 |
| Adenocarcinoma | 56 (81.2) | 53 (76.8) |  |
| Mucinous or signet ring cell carcinoma | 13 (18.8) | 16 (23.2) |  |
| Tumor differentiation (%) |  |  | 1.000 |
| Well to moderately differentiated | 52 (75.3) | 52 (75.3) |  |
| Poorly differentiated and others | 17 (24.7) | 17 (24.7) |  |
| Postoperative hospital stay (days) | 7.9 ± 6.5 | 9.3 ± 8.1 | 0.257 |
| Lymph nodes retrieved | 26.1± 16.5 | 25.8 ± 13.1 | 0.905 |
| Metastatic lymph nodes | 1.1 ± 2.5 | 1.7 ± 3.7 | 0.353 |
| Tumor size (cm) | 4.2 ± 1.9 | 4.7 ± 2.2 | 0.160 |
| Pathological T stage (%) |  |  | 0.601 |
| 1 | 3 (4.3) | 62 (2.9) |  |
| 2 | 15 (21.7) | 12 (17.4) |  |
| 3 | 47 (68.1) | 47 (68.1) |  |
| 4 | 4 (5.8) | 8 (11.6) |  |
| Pathological N stage (%) |  |  | 0.237 |
| N0 | 49 (71.0) | 42 (60.9) |  |
| N1 | 10 (14.5) | 18 (26.1) |  |
| N2 | 10 (14.5) | 9 (13.0) |  |
| Pathological M stage (%) |  |  | 0.017 |
| M0 | 67(97.1) | 58(84.1) |  |
| M1 | 2 (2.9) | 11 (15.9) |  |
| Nerval invasion (%) | 10(11.5) | 21(30.4) | 0.040 |
| Vascular invasion (%) | 9(13.0) | 6 (8.7) | 0.586 |

**Supply table 4** Baseline characteristics in LARC patients

| **Characteristics** | **LARC patients (n=58)** |
| --- | --- |
| Sex (%) |  |
| Male | 42 (72.4) |
| Female | 16 (27.6) |
| Age (years) | 59.7± 11.6 |
| ASA score (%) |  |
| 1 | 41 (70.7) |
| 2 | 11 (19.0) |
| 3 | 6(10.3) |
| Emergency operation | 1 (1.7) |
| TRG grade |  |
| 0 | 7 (12.1) |
| 1 | 28 (48.3) |
| 2 | 14 (24.1) |
| 3 | 9 (15.5) |
| Histopathology |  |
| Ulcering | 55 (94.8) |
| Expanding | 2(3.4) |
| Infiltrating | 1(1.7) |
| Histopathology (%) |  |
| Adenocarcinoma | 51 (87.9) |
| Mucinous or signet ring cell carcinoma | 7 (12.1) |
| Tumor differentiation (%) |  |
| Well to moderately differentiated | 48 (82.8) |
| Poorly differentiated and others | 10 (17.2) |
| Postoperative hospital stay (days) | 8.6 ± 6.5 |
| Lymph nodes retrieved | 17.1± 10.0 |
| Metastatic lymph nodes | 1.9 ± 3.3 |
| Tumor size (cm) | 4.0 ± 2.4 |
| Pathological T stage (%) |  |
| 0 | 7 (12.2) |
| 1 | 7 (12.2) |
| 2 | 9 (15.5) |
| 3 | 34 (58.6) |
| 4 | 1 (1.7) |
| Pathological N stage (%) |  |
| N0 | 27 (46.6) |
| N1 | 20 (34.5) |
| N2 | 11 (19.0) |
| Nerval invasion (%) | 14(24.1) |
| Vascular invasion (%) | 4(6.9) |

LARC: locally advanced rectal cancer; NCRT, neoadjuvant chemoradiotherapy; TRG, tumor regression grade;

**Supplementary table 5** The differential expression lncRNAs

| COLCA1 | LINC01135 |
| --- | --- |
| PCOTH | LINC00323 |
| LINC00909 | DBET |
| LINC01006 | DLEU2L |
| C5orf17 | LINC01879 |
| SMCR5 | HSD52 |
| LINC00470 | FAM138C |
| FLJ33534 | LINC00315 |

Supply figure


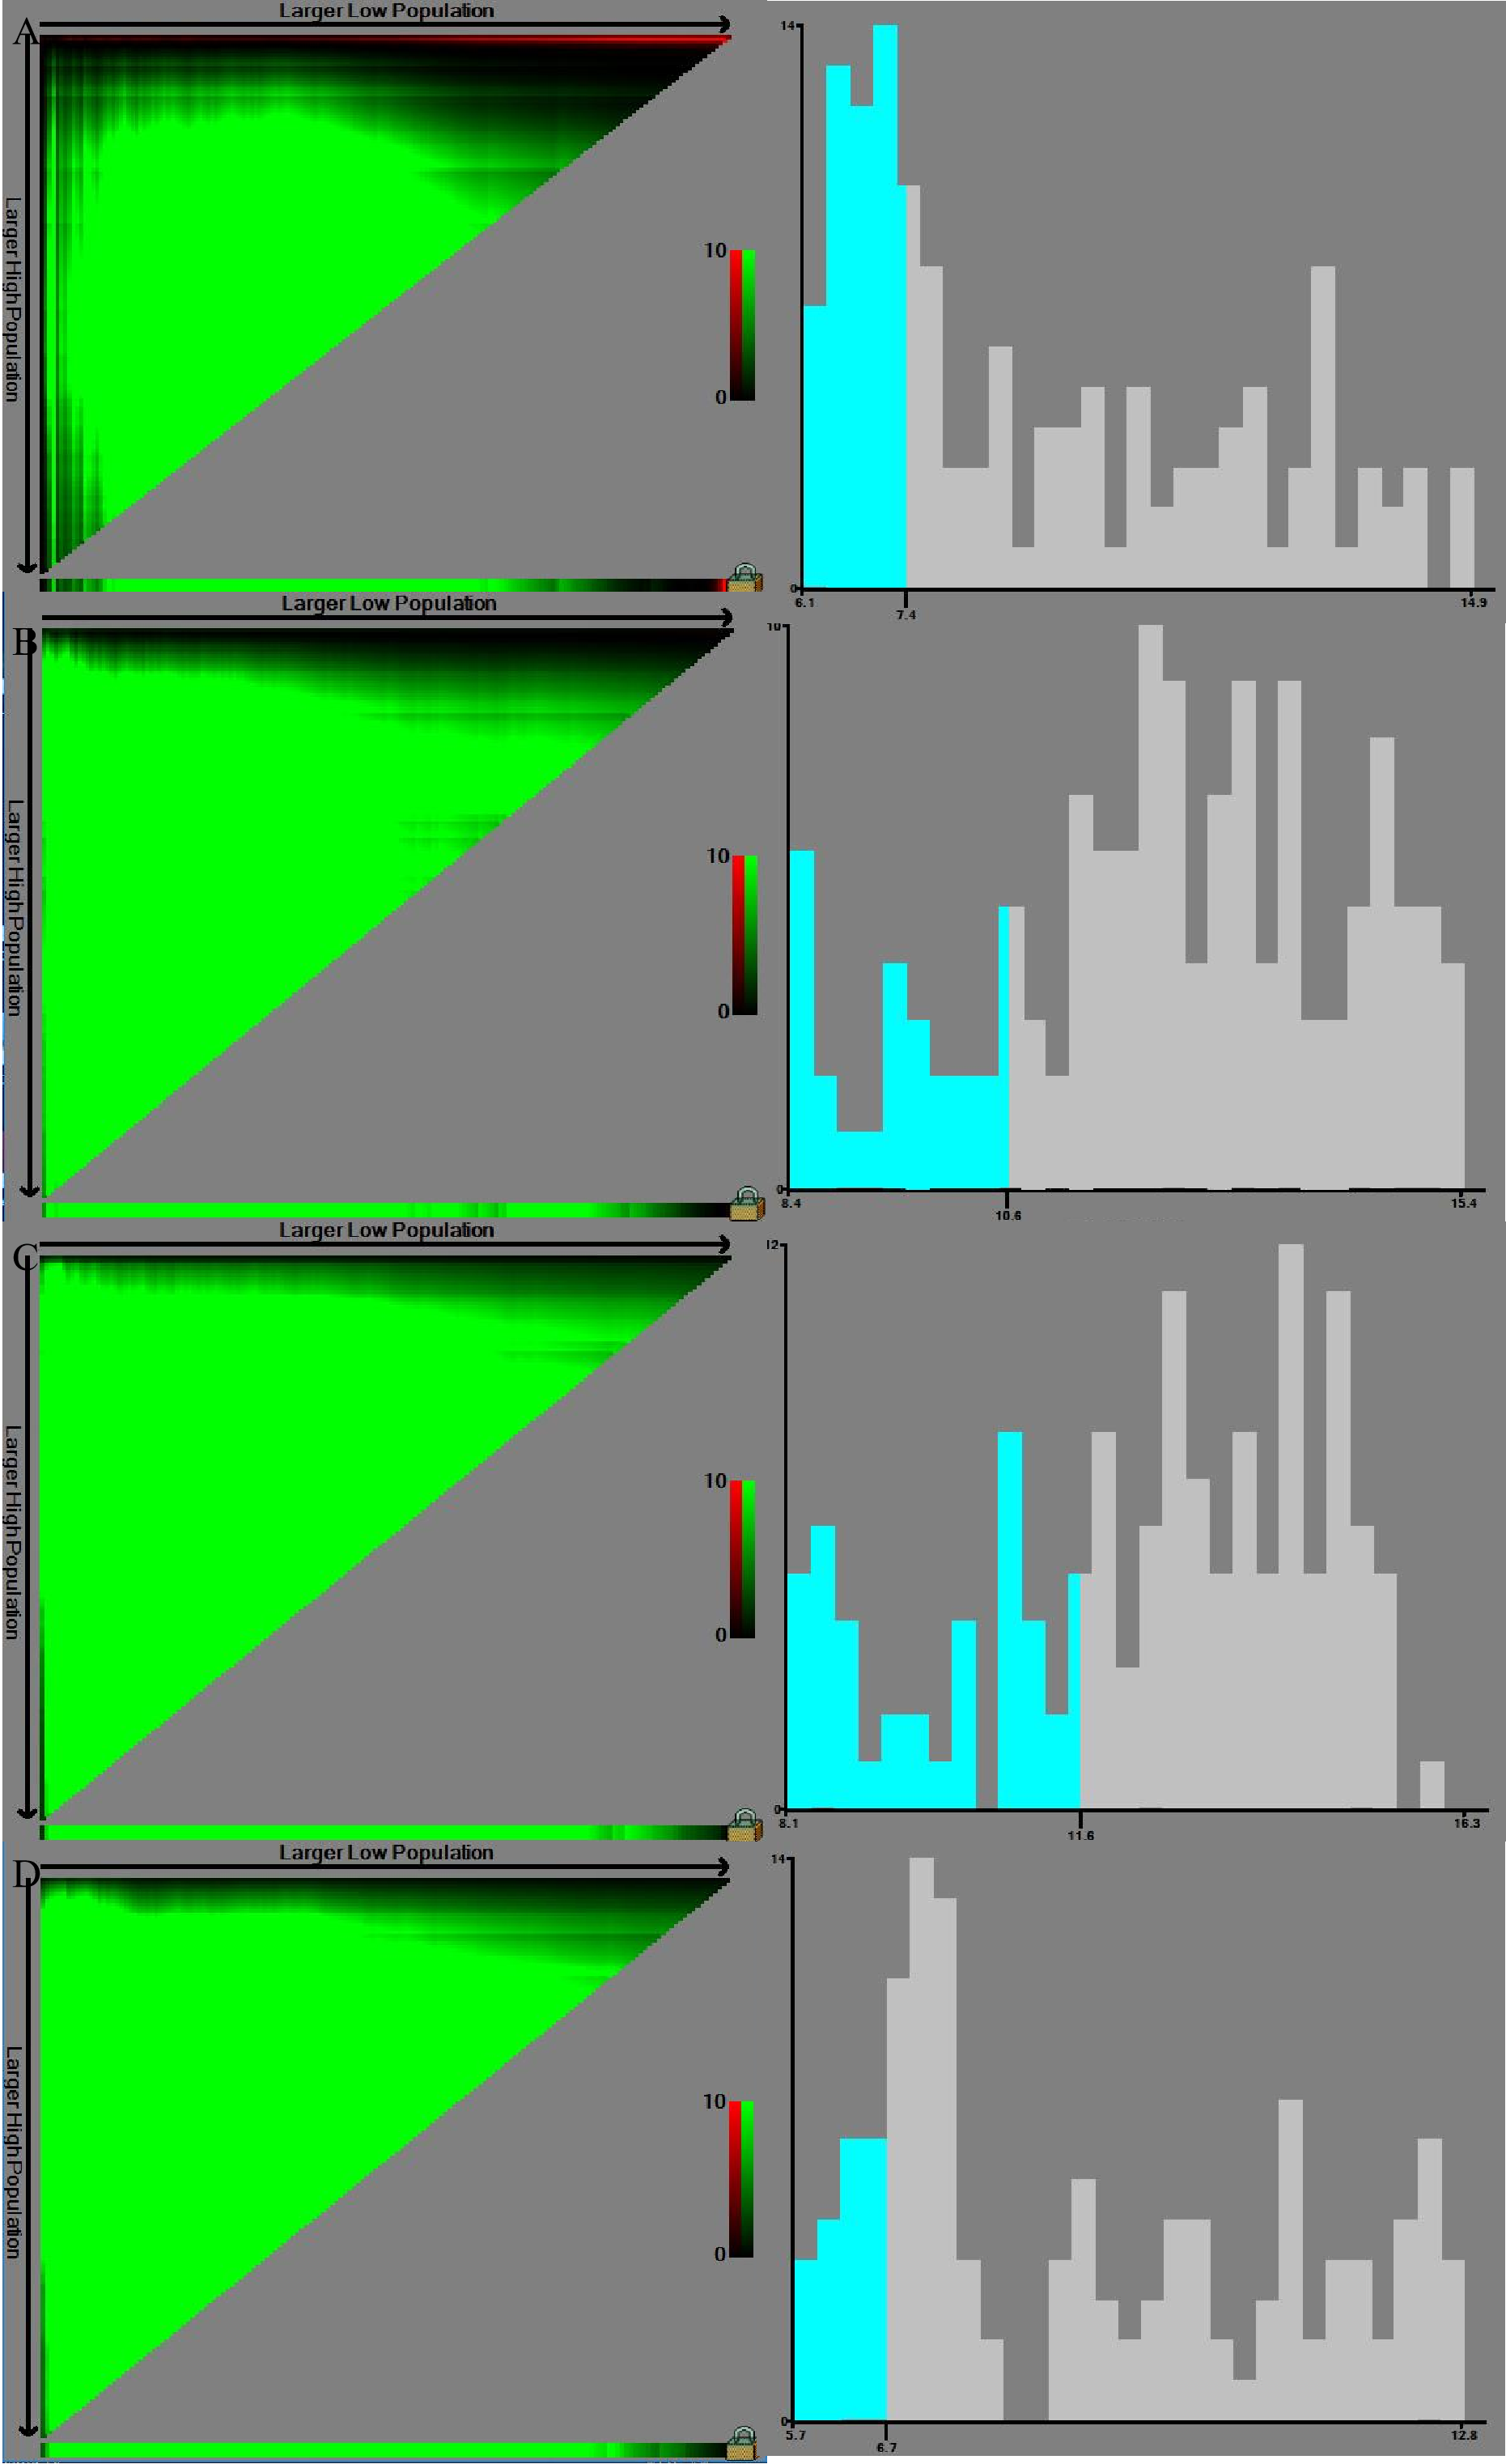


Supplementary Figure 1

The result of X-tile.


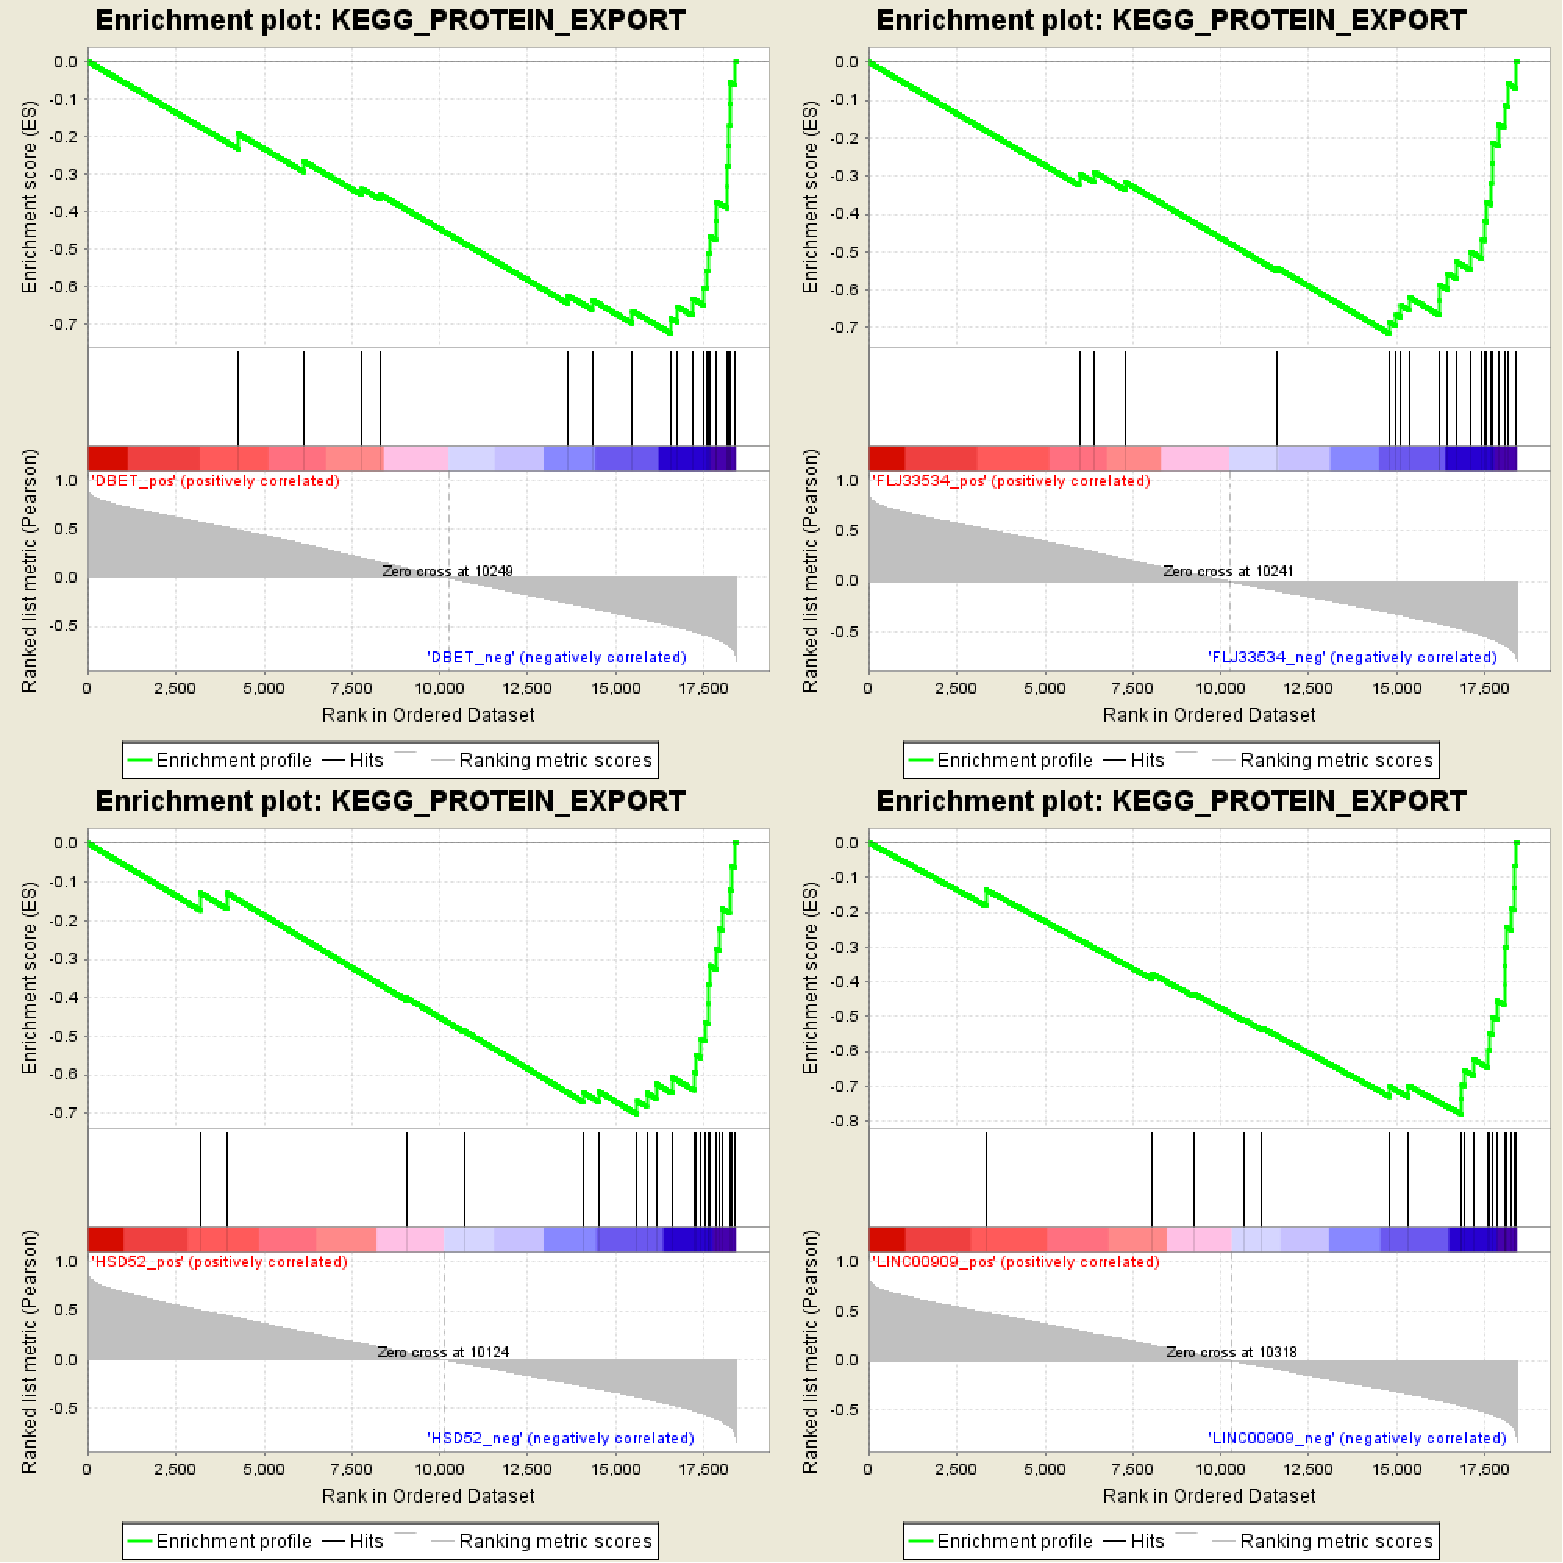


Supplementary Figure 2

The GSEA result of the four lncRNAs.
